# Supplementary material for: Transcription Regulation of Sex-Biased Genes during Ontogeny in the Malaria Vector Anopheles gambiae
Source: PubMed Central journal article supplement (PMC3128074; doi:10.1371/journal.pone.0021572), 2011-06-30

**Figure S6**

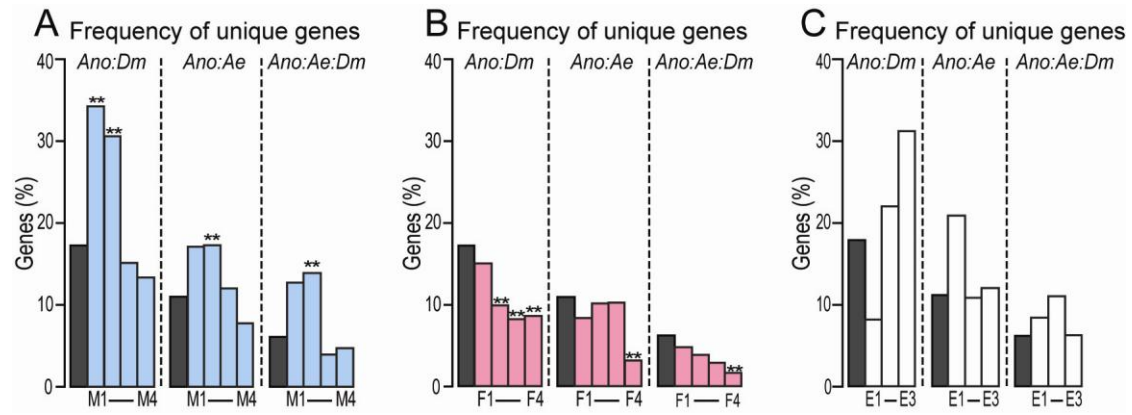

Supplement: pone.0021572.s006.pdf [file pone.0021572.s006.pdf]
